# Supplementary material for: Multifunctional mixed valence N-doped CNT@MFe2O4 hybrid nanomaterials: from engineered one-pot coprecipitation to application in energy storage paper supercapacitors
Source: Royal Society of Chemistry journal article supplement (doi:10.1039/c8nr03533d), 2018-01-01
Supplement: c8nr03533d1.pdf [file c8nr03533d1.pdf]

## Electronic Supplementary Information

### **Multifunctional Mixed Valence N-doped CNT@MFe<sub>2</sub>O<sub>4</sub> Hybrid Nanomaterials: From Engineered One-Pot Coprecipitation to Application in Energy Storage Paper Supercapacitors**

Clara Pereira,<sup>\*,a</sup> Rui S. Costa,<sup>a,b</sup> Laury Lopes,<sup>a</sup> Belén Bachiller-Baeza,<sup>c</sup> Inmaculada Rodríguez-Ramos,<sup>c</sup> Antonio Guerrero-Ruiz,<sup>d</sup> Pedro B. Tavares,<sup>e</sup> Cristina Freire,<sup>a</sup> and André M. Pereira<sup>\*,b</sup>

<sup>a</sup> REQUIMTE/LAQV, Departamento de Química e Bioquímica, Faculdade de Ciências, Universidade do Porto, Rua do Campo Alegre s/n, 4169-007 Porto, Portugal

<sup>b</sup> IFIMUP and IN – Institute of Nanoscience and Nanotechnology, Departamento de Física e Astronomia, Faculdade de Ciências, Universidade do Porto, 4169-007 Porto, Portugal

<sup>c</sup> Instituto de Catálisis y Petroleoquímica, CSIC, C/ Marie Curie 2, Cantoblanco, 28049 Madrid, Spain

<sup>d</sup> Departamento de Química Inorgánica y Química Técnica, Facultad de Ciencias, UNED, Senda del Rey 9, 28040 Madrid, Spain

<sup>e</sup> Departamento de Química and CQ-VR, Universidade de Trás-os-Montes e Alto Douro, 5001-801 Vila Real, Portugal

#### **\*Corresponding authors:**

Dr. Clara Pereira: Tel: +351 220402576; Fax: +351 220402659; e-mail: [clara.pereira@fc.up.pt](mailto:clara.pereira@fc.up.pt)

Prof. André M. Pereira: Tel: +351 220402369; Fax: +351 220402406; e-mail: [ampereira@fc.up.pt](mailto:ampereira@fc.up.pt)

## **Physicochemical characterization (additional information):**

**TEM:** The samples were dispersed in high-purity absolute ethanol under sonication, after which a carbon-coated 400 mesh copper grid was immersed in the suspension and then air-dried.

**XPS:** A pass energy of 80 eV was used for the survey spectra (step size = 1.0 eV) and 40 eV for the regions of interest (ROI, step size = 0.1 eV). Data acquisition was performed using VISION software at a pressure lower than  $1 \times 10^{-6}$  Pa. Electrostatic charging effects were corrected using a charge neutralization system. The surface atomic percentages were calculated from the corresponding peak areas using the sensitivity factors provided by the manufacturer.

**Electrical conductivity measurements:** In order to study the intrinsic electrical conductivity ( $\sigma$ ) of the as-prepared nanomaterials, the samples were pressed into 13 mm diameter pellets using a laboratory hydraulic press (2 ton, 10 sec), without performing any dilution step (*i.e.*, without previous dispersion in a polymeric matrix).

**Table S1.** Core-level binding energies and areas of the main components for CNT-N based nanomaterials obtained by curve fitting of XPS spectra<sup>a</sup>

| Material                         | C 1s                 |                       | N 1s                 |                       | O 1s                 |                       | Fe 2p <sub>3/2</sub>     |                       | Fe 2p <sub>1/2</sub>     |                       | Co 2p <sub>3/2</sub>     |                       | Co 2p <sub>1/2</sub>     |                       |
|----------------------------------|----------------------|-----------------------|----------------------|-----------------------|----------------------|-----------------------|--------------------------|-----------------------|--------------------------|-----------------------|--------------------------|-----------------------|--------------------------|-----------------------|
|                                  | BE (eV) <sup>b</sup> | Area (%) <sup>c</sup> | BE (eV) <sup>b</sup> | Area (%) <sup>c</sup> | BE (eV) <sup>b</sup> | Area (%) <sup>c</sup> | BE (eV) <sup>b</sup>     | Area (%) <sup>c</sup> | BE (eV) <sup>b</sup>     | Area (%) <sup>c</sup> | BE (eV) <sup>b</sup>     | Area (%) <sup>c</sup> | BE (eV) <sup>b</sup>     | Area (%) <sup>c</sup> |
| CNT-N                            | 284.6 (0.9)          | 44.0                  | 398.4 (1.9)          | 20.3                  | 530.8 (2.3)          | 43.6                  | 711.6 (4.5)              | 100.0                 | n.d. <sup>d</sup>        | n.d. <sup>d</sup>     | –                        | –                     | –                        | –                     |
|                                  | 285.1 (1.4)          | 22.6                  | 400.0 (1.9)          | 21.9                  | 532.7 (2.3)          | 51.8                  |                          |                       |                          |                       |                          |                       |                          |                       |
|                                  | 286.2 (1.4)          | 12.1                  | 401.3 (1.9)          | 43.1                  | 535.6 (2.3)          | 4.6                   |                          |                       |                          |                       |                          |                       |                          |                       |
|                                  | 287.3 (1.4)          | 5.4                   | 403.7 (1.9)          | 10.4                  |                      |                       |                          |                       |                          |                       |                          |                       |                          |                       |
|                                  | 288.6 (1.4)          | 2.4                   | 406.5 (1.9)          | 4.3                   |                      |                       |                          |                       |                          |                       |                          |                       |                          |                       |
|                                  | 290.6 (4.8)          | 13.5                  |                      |                       |                      |                       |                          |                       |                          |                       |                          |                       |                          |                       |
| CNT-N@Co                         | 284.6 (0.8)          | 41.3                  | 398.3 (1.7)          | 16.9                  | 530.0 (1.3)          | 59.1                  | 710.8 (2.9) <sup>e</sup> | 37.2                  | 724.1 (2.9) <sup>e</sup> | 14.9                  | 780.1 (2.0) <sup>e</sup> | 27.0                  | 795.8 (2.0) <sup>e</sup> | 13.4                  |
|                                  | 285.1 (1.3)          | 23.4                  | 399.7 (1.7)          | 24.3                  | 531.4 (1.3)          | 24.6                  | 713.3 (2.9) <sup>f</sup> | 14.5                  | 726.6 (2.9) <sup>f</sup> | 7.2                   | 781.8 (2.0) <sup>f</sup> | 9.2                   | 797.5 (2.0) <sup>f</sup> | 4.6                   |
|                                  | 286.1 (1.3)          | 12.3                  | 401.3 (1.7)          | 44.7                  | 532.4 (1.3)          | 11.6                  | 718.8 (7.1) <sup>g</sup> | 17.5                  | 732.1 (7.1) <sup>g</sup> | 8.7                   | 786.9 (5.1) <sup>g</sup> | 30.6                  | 802.6 (5.1) <sup>g</sup> | 15.2                  |
|                                  | 287.2 (1.3)          | 5.6                   | 403.5 (1.7)          | 11.1                  | 533.5 (1.3)          | 4.7                   |                          |                       |                          |                       |                          |                       |                          |                       |
|                                  | 288.5 (1.3)          | 3.1                   | 406.0 (1.7)          | 3.0                   |                      |                       |                          |                       |                          |                       |                          |                       |                          |                       |
|                                  | 290.6 (4.8)          | 14.3                  |                      |                       |                      |                       |                          |                       |                          |                       |                          |                       |                          |                       |
| CoFe <sub>2</sub> O <sub>4</sub> | 283.7 (1.6)          | 12.9                  | 400.0 (1.7)          | 22.3                  | 530.0 (1.3)          | 57.8                  | 710.8 (2.9) <sup>e</sup> | 32.5                  | 724.1 (2.9) <sup>e</sup> | 12.9                  | 780.1 (2.1) <sup>e</sup> | 24.6                  | 795.8 (2.1) <sup>e</sup> | 12.2                  |
|                                  | 285.4 (1.6)          | 54.1                  | 403.2 (1.7)          | 77.7                  | 531.5 (1.3)          | 29.0                  | 713.3 (2.9) <sup>f</sup> | 14.1                  | 726.6 (2.9) <sup>f</sup> | 7.0                   | 781.9 (2.1) <sup>f</sup> | 7.6                   | 797.6 (2.1) <sup>f</sup> | 3.8                   |
|                                  | 286.9 (1.6)          | 21.9                  |                      |                       | 532.5 (1.3)          | 12.6                  | 718.8 (8.1) <sup>g</sup> | 22.3                  | 732.1 (8.1) <sup>g</sup> | 11.2                  | 786.9 (6.3) <sup>g</sup> | 34.5                  | 802.6 (6.3) <sup>g</sup> | 17.3                  |
|                                  | 288.6 (1.6)          | 11.1                  |                      |                       | 533.7 (1.3)          | 0.6                   |                          |                       |                          |                       |                          |                       |                          |                       |

<sup>a</sup> The core-level binding energies and areas of the trace components in the F 1s and Si 2p regions are presented in the Supporting Information.<sup>b</sup> The values between brackets refer to the FWHM of the bands.<sup>c</sup> Area of each component relative to the total core-level peak area.<sup>d</sup> n.d. – not detected.<sup>e</sup> Metal cations located in octahedral sites.<sup>f</sup> Metal cations located in tetrahedral sites<sup>g</sup> Shake-up satellite peak.

**Table S2.** Core-level binding energies and areas of the components in the F 1s and Si 2p regions for CNT-N based nanomaterials obtained by curve fitting of XPS spectra

| Material | F 1s              |                  | Si 2p <sub>3/2</sub> |                  | Si 2p <sub>1/2</sub> |                  |
|----------|-------------------|------------------|----------------------|------------------|----------------------|------------------|
|          | BE                | Area             | BE                   | Area             | BE                   | Area             |
|          | (eV) <sup>a</sup> | (%) <sup>b</sup> | (eV) <sup>a</sup>    | (%) <sup>b</sup> | (eV) <sup>a</sup>    | (%) <sup>b</sup> |
| CNT-N    | 685.7 (4.2)       | 100              | 102.4 (2.0)          | 66.7             | 103.0 (2.0)          | 33.3             |
| CNT-N@Co | 684.4 (2.0)       | 100              | 101.6 (3.0)          | 66.7             | 102.2 (3.0)          | 33.3             |

<sup>a</sup> The values between brackets refer to the FWHM of the bands.

<sup>b</sup> Area of each component relative to the total core-level peak area.

**Table S3.** Comparison of the energy storage performance of the paper SCs prepared in this work with that of other paper-based SCs recently reported in the literature<sup>a</sup>

| Substrate                                                   | Electrode Materials                                                             | Electrolyte                         | Fabrication process                          | Specific capacitance of the SC cell                                                                   | Energy density                                            | Power density                                            | Ref.      |
|-------------------------------------------------------------|---------------------------------------------------------------------------------|-------------------------------------|----------------------------------------------|-------------------------------------------------------------------------------------------------------|-----------------------------------------------------------|----------------------------------------------------------|-----------|
| Nylon filter paper                                          | CNT-N//CNT-N                                                                    | PVA/H <sub>3</sub> PO <sub>4</sub>  | Vacuum filtration                            | 21.58 F cm <sup>-3</sup> at 0.5 mV s <sup>-1</sup><br>110.36 mF cm <sup>-2</sup>                      | 1.44 mW h cm <sup>-3</sup><br>7.37 μW h cm <sup>-2</sup>  | 39.53 mW cm <sup>-3</sup><br>202.16 μW cm <sup>-2</sup>  | This work |
|                                                             | CNT-N//CNT-N@Co                                                                 | PVA/H <sub>3</sub> PO <sub>4</sub>  | Vacuum filtration                            | 14.73 F cm <sup>-3</sup> at 0.5 mV s <sup>-1</sup><br>53.30 mF cm <sup>-2</sup>                       | 4.05 mW h cm <sup>-3</sup><br>14.65 μW h cm <sup>-2</sup> | 170.44 mW cm <sup>-3</sup><br>616.73 μW cm <sup>-2</sup> |           |
|                                                             | CNT-N//CNT-N@Mn                                                                 | PVA/H <sub>3</sub> PO <sub>4</sub>  | Vacuum filtration                            | 25.69 F cm <sup>-3</sup> at 0.5 mV s <sup>-1</sup><br>123.59 mF cm <sup>-2</sup>                      | 4.04 mW h cm <sup>-3</sup><br>19.45 μW h cm <sup>-2</sup> | 44.42 mW cm <sup>-3</sup><br>213.73 μW cm <sup>-2</sup>  |           |
|                                                             | CNT-N//CNT-N@Fe                                                                 | PVA/H <sub>3</sub> PO <sub>4</sub>  | Vacuum filtration                            | 20.45 F cm <sup>-3</sup> at 0.5 mV s <sup>-1</sup><br>89.44 mF cm <sup>-2</sup>                       | 7.85 mW h cm <sup>-3</sup><br>34.31 μW h cm <sup>-2</sup> | 84.17 mW cm <sup>-3</sup><br>368.09 μW cm <sup>-2</sup>  |           |
|                                                             | +CNT-N@Fe//CNT-N@Mn-                                                            | PVA/H <sub>3</sub> PO <sub>4</sub>  | Vacuum filtration                            | 22.91 F cm <sup>-3</sup> at 0.5 mV s <sup>-1</sup><br>95.06 mF cm <sup>-2</sup>                       | 8.63 mW h cm <sup>-3</sup><br>35.81 μW h cm <sup>-2</sup> | 55.68 mW cm <sup>-3</sup><br>230.99 μW cm <sup>-2</sup>  |           |
|                                                             | +CNT-N@Mn//CNT-N@Fe-                                                            | PVA/H <sub>3</sub> PO <sub>4</sub>  | Vacuum filtration                            | 21.32 F cm <sup>-3</sup> at 0.5 mV s <sup>-1</sup><br>88.46 mF cm <sup>-2</sup>                       | 6.20 mW h cm <sup>-3</sup><br>25.71 μW h cm <sup>-2</sup> | 42.96 mW cm <sup>-3</sup><br>178.19 μW cm <sup>-2</sup>  |           |
| Cellulose filter paper                                      | graphene nanosheets ink                                                         | PVA/H <sub>2</sub> SO <sub>4</sub>  | Vacuum filtration                            | 46 mF cm <sup>-2</sup> (laminated, one cell)<br>17 mF cm <sup>-2</sup> (laminated, 3 in-series units) | -<br>15 μW h cm <sup>-2</sup> (3 in-series units)         | -<br><100 μW cm <sup>-2</sup> (3 in-series units)        | [1]       |
| Air-laid paper (composed of cellulose and polyester fibers) | CNT ink                                                                         | KOH                                 | Dip-and-dry process                          | 35 mF cm <sup>-2</sup> at 1 mA cm <sup>-2</sup>                                                       | -                                                         | -                                                        | [2]       |
|                                                             | CNT ink/MnO <sub>2</sub>                                                        | KOH                                 |                                              | 123 mF cm <sup>-2</sup> at 1 mA cm <sup>-2</sup>                                                      | 4.2 μW h cm <sup>-2</sup>                                 | 4000 μW cm <sup>-2</sup>                                 |           |
|                                                             | CNT ink/MnO <sub>2</sub>                                                        | PVA/KOH                             |                                              | 73 mF cm <sup>-2</sup> at 0.6 mA cm <sup>-2</sup>                                                     | 1.8 μW h cm <sup>-2</sup>                                 | ~127 μW cm <sup>-2</sup> <sup>b</sup>                    |           |
| Commercial cellulose paper                                  | +Ni(OH) <sub>2</sub> /Ni/graphite//Mn <sub>3</sub> O <sub>4</sub> /Ni/graphite- | PVA/NaOH                            | Spray + pencil drawing + electrodeposition   | 3.05 F cm <sup>-3</sup> at 10 mV s <sup>-1</sup>                                                      | 0.35 mW h cm <sup>-3</sup>                                | 32.5 mW cm <sup>-3</sup>                                 | [3]       |
| Laboratory filter paper                                     | +MnO <sub>2</sub> /Ni//AC/Ni-                                                   | PVA/Na <sub>2</sub> SO <sub>4</sub> | electroless plating method electrodeposition | 2.0 F cm <sup>-3</sup> at 5 mV s <sup>-1</sup><br>700 mF cm <sup>-2</sup>                             | 0.78 mW h cm <sup>-3</sup>                                | 2.5 mW cm <sup>-3</sup>                                  | [4]       |
| Lab-made bacterial cellulose paper                          | Graphene/PANI                                                                   | H <sub>2</sub> SO <sub>4</sub>      | Vacuum filtration                            | 1320 mF cm <sup>-2</sup> at 0.25 mA cm <sup>-2</sup>                                                  | 120 μW h cm <sup>-2</sup><br>18 μW h cm <sup>-2</sup>     | 100 μW cm <sup>-2</sup><br>4450 μW cm <sup>-2</sup>      | [5]       |

<sup>a</sup> AC – activated carbon; NWs – nanowires; PANI – polyaniline; PPy – polypyrrole. <sup>b</sup> Estimated by eye.

**Table S3 (cont.).** Comparison of the energy storage performance of the paper SCs prepared in this work with that of other paper-based SCs recently reported in the literature<sup>a</sup>

| Substrate                 | Electrode Materials                                                                          | Electrolyte                        | Fabrication process                | Specific capacitance of the SC cell                | Energy density | Power density | Ref. |
|---------------------------|----------------------------------------------------------------------------------------------|------------------------------------|------------------------------------|----------------------------------------------------|----------------|---------------|------|
| Xerox paper               | Graphite pencil                                                                              | H <sub>2</sub> SO <sub>4</sub>     | Pencil drawing                     | 1.13 mF cm <sup>-2</sup> at 200 mA g <sup>-1</sup> |                |               | [6]  |
| In-house paper            | Graphite pencil                                                                              | H <sub>2</sub> SO <sub>4</sub>     | Pencil drawing                     | 2.3 mF cm <sup>-2</sup> at 200 mA g <sup>-1</sup>  |                |               | [6]  |
| Xerox paper               | Thin graphite sheets (pencil)/PPy                                                            | PVA/H <sub>3</sub> PO <sub>4</sub> | Pencil drawing + electrodeposition | 52.9 F cm <sup>-3</sup> at 1 mV s <sup>-1</sup>    |                |               | [7]  |
| A4 Xerox paper            | Exfoliated graphene ink                                                                      | PVA/H <sub>2</sub> SO <sub>4</sub> | Paintbrush coating                 | ~11.3 mF cm <sup>-2</sup> at 1 mV s <sup>-1</sup>  |                |               | [8]  |
| Cellulose nanofiber paper | Positively-charged PANI NWs followed by negatively-charged reduced graphene oxide nanosheets | PVA/H <sub>2</sub> SO <sub>4</sub> | Dip-coating, layer-by-layer        | 5.72 mF cm <sup>-2</sup> at 2 mV s <sup>-1</sup>   |                |               | [9]  |

<sup>a</sup> AC – activated carbon; NWs – nanowires; PANI – polyaniline; PPy – polypyrrole. <sup>b</sup> Estimated by eye.

**Fig. S1.** Electrical conductivity as a function of the frequency of the CNT-N based nanomaterials in the frequency range of 20 Hz to 3 MHz.

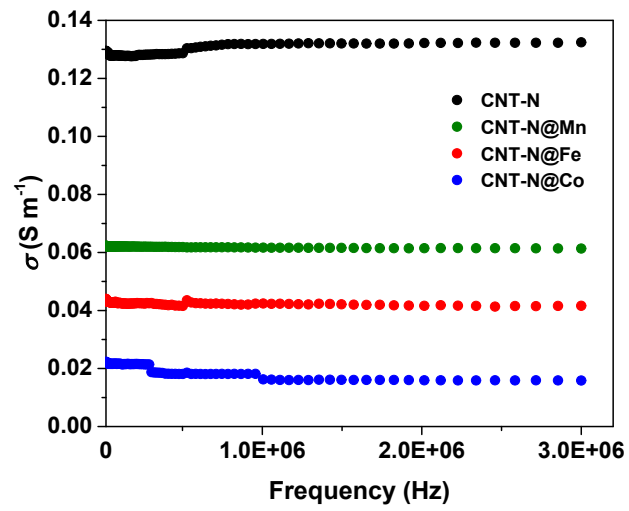

**Fig. S2.** Cyclic voltammograms of CNT-N//CNT-N paper SC at different scan rates.

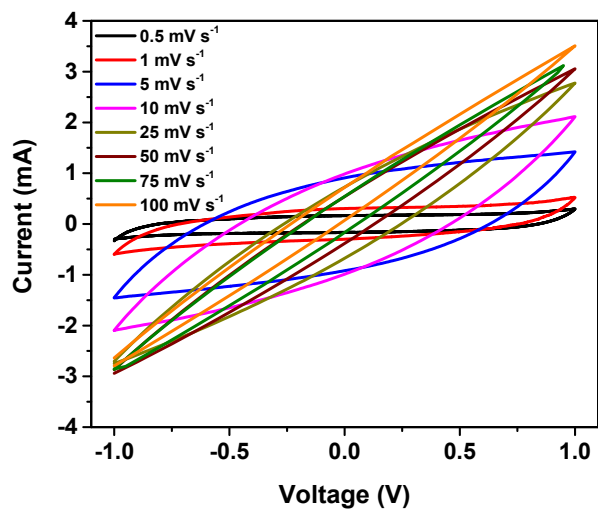



## References

- 1 Z. Weng, Y. Su, D.-W. Wang, F. Li, J. Du and H.-M. Cheng, *Adv. Energy Mater.*, 2011, **1**, 917–922.
- 2 L. Dong, C. Xu, Y. Li, Z. Pan, G. Liang, E. Zhou, F. Kang and Q.-H. Yang, *Adv. Mater.*, 2016, **28**, 9313–9319.
- 3 J.-X. Feng, S.-H. Ye, X.-F. Lu, Y.-X. Tong and G.-R. Li, *ACS Appl. Mater. Interf.*, 2015, **7**, 11444–11451.
- 4 L. Zhang, P. Zhu, F. Zhou, W. Zeng, H. Su, G. Li, J. Gao, R. Sun and C.-P. Wong, *ACS Nano*, 2016, **10**, 1273–1282.
- 5 R. Liu, L. Ma, S. Huang, J. Mei, J. Xu and G. Yuan, *New J. Chem.*, 2017, **41**, 857–864.
- 6 G. Zheng, L. Hu, H. Wu, X. Xie and Y. Cui, *Energy Environ. Sci.*, 2011, **4**, 3368–3373.
- 7 J. Tao, W. Ma, N. Liu, X. Ren, Y. Shi, J. Su and Y. Gao, *Nano-Micro Lett.*, 2015, **7**, 276–281.
- 8 K. Parvez, Z.-S. Wu, R. Li, X. Liu, R. Graf, X. Feng and K. Müllen, *J. Am. Chem. Soc.*, 2014, **136**, 6083–6091.
- 9 X. Wang, K. Gao, Z. Shao, X. Peng, X. Wu and F. Wang, *J. Power Sources*, 2014, **249**, 148–155.
